# Linkage Disequilibrium and Heterozygosity Modulate the Genetic Architecture of Human Complex Phenotypes: Evidence of Natural Selection from GWAS Summary Statistics

Dominic Holland<sup>a,b,\*</sup>, Oleksandr Frei<sup>d</sup>, Rahul Desikan<sup>c</sup>, Chun-Chieh Fan<sup>a,e,f</sup>, Alexey A. Shadrin<sup>d</sup>, Olav B. Smeland<sup>a,d,g</sup>, Ole A. Andreassen<sup>d,g</sup>, Anders M. Dale<sup>a,b,f,h</sup>

<sup>a</sup>Center for Multimodal Imaging and Genetics, University of California at San Diego, La Jolla, CA 92037, USA,

<sup>b</sup>Department of Neurosciences, University of California, San Diego, La Jolla, CA 92093, USA,

<sup>c</sup>Department of Radiology, University of California, San Francisco, San Francisco, CA 94158, USA,

<sup>d</sup>NORMENT, KG Jebsen Centre for Psychosis Research, Institute of Clinical Medicine, University of Oslo 0424 Oslo, Norway,

<sup>e</sup>Department of Cognitive Sciences, University of California at San Diego, La Jolla, CA 92093, USA,

<sup>f</sup>Department of Radiology, University of California, San Diego, La Jolla, CA 92093, USA,

<sup>g</sup>Division of Mental Health and Addiction, Oslo University Hospital, 0407 Oslo, Norway,

<sup>h</sup>Department of Psychiatry, University of California, San Diego, La Jolla, CA 92093, USA,

## Abstract

We propose an extended Gaussian mixture model for the distribution of causal effects of common single nucleotide polymorphisms (SNPs) for human complex phenotypes, taking into account linkage disequilibrium (LD) and heterozygosity (H), while also allowing for independent components for small and large effects. Using a precise methodology showing how genome-wide association studies (GWAS) summary statistics ( $z$ -scores) arise through LD with underlying causal SNPs, we applied the model to multiple GWAS. Our findings indicated that causal effects are distributed with dependence on a SNP's total LD and H, whereby SNPs with lower total LD are more likely to be causal, and causal SNPs with lower H tend to have larger effects, consistent with the influence of negative pressure from natural selection. The degree of dependence, however, varies markedly across phenotypes.

**Keywords:** GWAS, Polygenicity, Discoverability, Heritability, Causal SNPs, Effect size, Linkage Disequilibrium

## INTRODUCTION

There is currently great interest in the distribution of causal effects among trait-associated single nucleotide polymorphisms (SNPs), and recent analyses of genome-wide association studies (GWAS) have begun uncovering deeper layers of complexity in the genetic architecture of complex traits [17, 10, 45, 46]. This research is facilitated by using new analytic approaches to interrogate structural features in the genome and their relationship to phenotypic expression. These analyses take into account the fact that different classes of SNPs have different characteristics and play a multitude of roles [32]. Along with different causal roles for SNPs, which in itself would suggest differences in distributions of effect-sizes for different sets of causal effects, the effects of minor allele frequency (MAF) of the causal SNPs and their total correlation with neighboring SNPs (total linkage disequilibrium, TLD [16], similar to LD score [3]) are providing new insights into the action of selection on the genetic architecture of complex traits [10, 43, 46].

Here we present a unifying approach, using Bayesian

analysis on GWAS summary statistics, to explore the role of TLD on the distribution of causal SNPs, and the impact of MAF on causal effect size, while simultaneously incorporating multiple effect-size distributions. Treating each of these factors independently is likely to provide a misleading assessment. Thus, we posit a model for the prior distribution of effect sizes, and building on previous work [17], fit it to the GWAS summary statistics for a wide range of phenotypes. From the estimated set of model parameters for a phenotypes, we generated simulated genotypes and calculated the corresponding  $z$ -scores. With a wide range of model parameters across real phenotypes, the specificity of the model parameters for a given phenotype are narrowly defining of the distribution of summary statistics for that phenotype. We find that the detailed distribution of GWAS summary statistics for real phenotypes are reproduced to high accuracy, while many of the parameters used to setup a simulated phenotype are accurately reproduced by the model. The distribution of causal SNPs with respect to their TLD will be shown to vary widely across different phenotypes.

In earlier work [17] we presented a Gaussian mixture model to describe the distribution of underlying causal SNP effects (the " $\beta$ " simple linear regression coefficients that indicate the strength of association between causal variants and a phenotype). Due to extensive and complex

---

\*Corresponding author:

email: dominic.holland@gmail.com

Phone: 858-822-1776

Fax: 858-534-1078

patterns of linkage disequilibrium between SNPs, many non-causal SNPs will exhibit a strong association with phenotypes, resulting in a far more complicated distribution for the summary z-scores. The basic model for the distribution of the causal  $\beta$ 's is a mixture of non-null and null normal distributions, the latter (denoted  $\mathcal{N}(0,0)$ ) being just a delta function:

$$\beta \sim \pi_1 \mathcal{N}(0, \sigma_\beta^2) + (1 - \pi_1) \mathcal{N}(0, 0) \quad (1)$$

where  $\pi_1$  is the polygenicity, i.e., the proportion of SNPs that are causal (equivalently, the prior probability that any particular SNP is causal), and  $\sigma_\beta^2$  is the discoverability, i.e., the variance of the non-null normal distribution, which was taken to be a constant across all causal SNPs. The distribution of z-scores arising from this shows strong heterozygosity and total LD (equivalently, LD score) dependence (Eqs. 21 and 29 in [16]). Implementing this relatively simple model (Eq. 1) and applying it to GWAS summary statistics involved a good deal of complexity, but resulted in remarkably good estimation of the overall distribution of z-scores, as demonstrated by the fit between the actual distribution of z-scores for multiple phenotypes and the model predictions, visualized on quantile-quantile (QQ) plots.

Given that GWAS, due to lack of power, consistently failed to discover the SNPs that explain the bulk of heritability, the objective of the model was to characterize the likely large number of causal SNPs of weak signal that evaded detection – and likely would explain missing or hidden heritability. Thus, the model was not intended to accurately predict the tails of the distribution of z-scores, which for large enough GWAS would correspond to already discovered SNPs (i.e., whose summary p-values reached genome-wide significance), and involved the simplifying assumption that the bulk of causal effects roughly followed the same Gaussian. Nevertheless, the predicted distributions captured the main characteristics of the SNP associations for many phenotypes. For some phenotypes, however, the fit was relatively poor, and even for phenotypes where the overall fit was good, a breakdown of the z-score distributions for SNPs stratified by heterozygosity and total LD indicated some unevenness in how well the tails of the sub-distributions were predicted. Additionally, recent work by others [45] indicated that it is important to take SNP heterozygosity into account as a component in discoverability, and that an additional Gaussian distribution for the  $\beta$ 's might be appropriate if large and small effects are distributed differently [46]. These approaches, however, were not combined (the former involving a single causal Gaussian incorporating heterozygosity, the latter involving two Gaussians with no heterozygosity dependence). An extra complexity is that total LD might play an important role in the distribution of causal effects [10]. It is unclear how all these factors impact each other.

## METHODS

In the current work, we sought to extend our earlier work to incorporate multiple Gaussians, while taking into account total LD and selection effects reflected in heterozygosity, in modeling the distribution of causal  $\beta$ 's. Note that this is independent of the need to correctly take heterozygosity and total LD into account when building a distribution for z-scores even when the distribution of causal effects ( $\beta$ 's) does *not* depend on these factors, as in our earlier work [16]. The appropriate methodology calls for using an extensive reference panel that likely involves all possible causal SNPs with MAF greater than some threshold (e.g., 1%), and regard the z-scores for typed or imputed SNPs – a subset of the reference SNPs – as arising, directly or through LD, from the underlying causal SNPs in the reference panel.

Since the single causal Gaussian, Eq. 1, has provided an appropriate starting point for many phenotypes, it is reasonable to build from it. With additional terms included, if it turns out that this original term is not needed, the fitting procedure, if implemented correctly, should eliminate it. Also, anticipating extra terms in the distribution of causal  $\beta$ 's, we introduce a slight change in labeling the Gaussian variance ( $\sigma_\beta^2 \rightarrow \sigma_b^2$ ), and write the distributions for the causal component only – it being understood that the full distribution will include the last term on the right side of Eq. 1 for the prior probability of being null.

Given that for some phenotypes there is strong evidence that rarer SNPs have larger effects, we next include a term that reflects this: a Gaussian whose variance is proportional to  $H^S$ , where  $H$  is the SNP's heterozygosity and  $S$  is a new parameter which, if negative, will reflect the noted behavior [45]. With the addition of the new term, the total prior probability for the SNP to be causal is still given by  $\pi_1$ . Thus, extending Eq. 1, we get:

$$\beta(H) \sim \pi_1 \left\{ (1 - p_c) \mathcal{N}(0, \sigma_b^2) + p_c \mathcal{N}(0, H^S \sigma_c^2) \right\} \quad (2)$$

(ignoring, as noted, the null component  $(1 - \pi_1) \mathcal{N}(0, 0)$ ), where  $p_c$  ( $0 \leq p_c \leq 1$ ) is the prior probability that the SNP's causal component comes from the “c” Gaussian (with variance  $H^S \sigma_c^2$ ), and  $p_b \equiv 1 - p_c$  is the prior probability that the SNP's causal component comes from the “b” Gaussian (with variance  $\sigma_b^2$ ). This extension introduces an extra three parameters  $p_c$ ,  $\sigma_c$ , and  $S$ , assumed for the moment to be the same for all SNPs. Setting  $p_c \equiv 1$  recovers the model distribution assumed in [45], and additionally setting  $\pi_1 \equiv 1$  recovers the model distribution assumed in [31].

If the “c” Gaussian is capturing larger effects from rarer SNPs, reflecting selection pressure, it is reasonable to inquire if the prior probability for a causal SNP's contribution from the “c” Gaussian is total LD-mediated – with lower probability for a SNP that has large total LD (TLD). Thus, instead of treating  $p_c$  as a constant, we explore the possibility that it is larger for SNPs with weaker TLD.

This can be accomplished by means of a generalized sigmoidal function that will have a maximum at very low TLD, might maintain that maximum for all SNPs (equivalently,  $p_c$  is a constant), or decrease in amplitude slowly or rapidly, possibly to 0, for SNPs with higher TLD. Such a function of TLD can be characterized by three parameters: its amplitude (at  $L = 1$ ), the TLD at the midpoint of the sigmoidal transition, and the width of the sigmoidal transition (over a wide or narrow range of TLD). We use the following general form with three parameters,  $y_{max}$ ,  $x_{mid}$ , and  $x_{width}$ :

$$y(x) = \frac{y_{max}}{1 + \exp((x - x_{mid})/x_{width})}, \quad (3)$$

defined in the range  $-\infty < x < \infty$ , for which  $y(x)$  is monotonically decreasing and bounded  $0 < y(x) < y_{max}$ , with  $0 \leq y_{max} \leq 1$ ;  $-\infty < x_{mid} < \infty$  locates the mid point of the overall sigmoidal transition ( $y(x_{mid}) = y_{max}/2$ ), and  $0 < x_{width} < \infty$  controls its width ( $y(x)$  smoothly changing from a Heaviside step function at  $x_{mid}$  as  $x_{width} \rightarrow 0$  to a constant function as  $x_{width} \rightarrow \infty$ ). Examples are shown in Figure 1; parameter values are in Supplementary Table S10. Mathematically, the curve can continue into the “negative TLD” range, revealing a familiar full sigmoidal shape; since we are interested in the range  $1 \leq x \leq \max(\text{TLD})$ , below we report the actual mid point (e.g.,  $m_c$ ) and width (e.g.,  $w_c$  defined below) of the transition that occurs in this range. Let the variable  $L$  be the TLD of a SNP. Then

$$\beta(H, L) \sim \pi_1 \{ (1 - p_c(L))\mathcal{N}(0, \sigma_b^2) + p_c(L)\mathcal{N}(0, H^S \sigma_c^2) \}, \quad (4)$$

where  $p_c(L)$  is the sigmoidal function ( $0 \leq p_c(L) \leq 1$  for all  $L$ ) given by  $y(x)$  in Eq. 3 for  $L = x \geq 1$ , which numerically can be found by fitting for its three characteristic parameters.

As a final possible extension, we add an extra term – a “d” Gaussian – to describe larger effects not well captured by the “b” and “c” Gaussians. This gives finally:

$$\beta(H, L) \sim \pi_1 \{ (1 - p_c(L) - p_d(L))\mathcal{N}(0, \sigma_b^2) + p_c(L)\mathcal{N}(0, H^S \sigma_c^2) + p_d(L)\mathcal{N}(0, \sigma_d^2) \}. \quad (5)$$

where  $\sigma_d^2$  is a new parameter,  $p_d(L)$  is another general sigmoid function ( $0 \leq p_d(L) \leq 1$  for all  $L$ ) where now there is the added constraint  $0 \leq p_c(L) + p_d(L) \leq 1$ , and the prior probability for the “b” Gaussian becomes  $p_b(L) \equiv 1 - p_c(L) - p_d(L)$ .

Depending on the phenotype and the GWAS sample size, it might not be feasible, or meaningful, to implement the full model. In particular, for low sample size and/or low discoverability, the “b” Gaussian is all that can be estimated, but in most cases both the “b” and “c” Gaussians can be estimated, and  $\beta$  will be well characterized by Eq. 4.

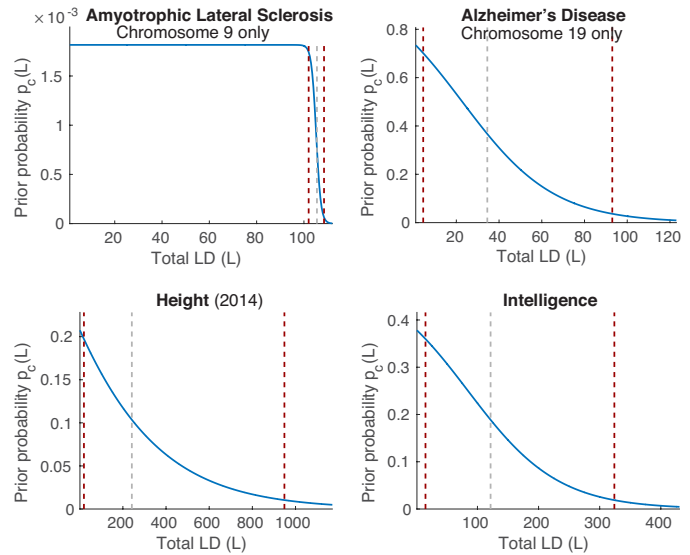

Figure 1: Examples of prior probability functions  $p_c(L)$  used in Eqs. 4 and 5, where  $L$  is reference SNP total LD (see Eq. 3 for the general expression, and Supplementary Table S10 for parameter values). These functions can be summarized by three quantities: the maximum value,  $p_{c1}$ , which occurs at  $L = 1$ ; the total LD value,  $L = m_c$ , where  $p_c(m_c) = p_{c1}/2$ , given by the gray dashed lines in the figure; and the total LD width of the transition region,  $w_c$ , defined as the distance between where  $p_c(L)$  falls to 95% and 5% of  $p_{c1}$  given by the flanking red dashed lines in the figure. Numerical values of  $p_{c1}$ ,  $m_c$ , and  $w_c$  are given in Table 1 and Figures 2 and 3.  $p_d(L)$  is similar. Plots of  $p_c(L)$  and  $p_d(L)$ , where relevant, for all phenotypes are shown in Supplementary Material Figures S5-S7.

As we described in our previous work [16], a z-score is given by a sum of random variables, so the *a posteriori* pdf (given the SNP’s heterozygosity and LD structure, and the phenotype’s model parameters) for such a composite random variable is given by the convolution of the pdfs for the component random variables. This facilitates an essentially exact calculation of the z-score’s *a posteriori* pdf arising from the underlying model of causal effects as specified by Eqn. 1, 4, or 5.

For our reference panel we used the 1000 Genomes phase 3 data set for 503 subjects/samples of European ancestry [6, 5, 39]. In ref. [16] we describe how we set up the general framework for analysis, including the use of the reference panel and dividing the reference SNPs into a sufficiently fine  $10 \times 10$  heterozygosity  $\times$  total LD grid to facilitate computations.

In our earlier work on the “b” model we gave an expression, denoted  $G(k)$ , for the Fourier transform of the genetic contribution to a z-score, where  $k$  is the running Fourier parameter. The extra complexity in the “c” and “d” models here requires a modification only in this term, which we describe in the Supplement. In addition to the parameters presented above, we also include an inflation parameter  $\sigma_0$ : if  $z_u$  denotes uninflated GWAS z-scores and  $z$  denotes actual GWAS z-scores, then  $\sigma_0$  is defined by  $z = \sigma_0 z_u$  [16]. The optimal model parameters for a particular phenotype are estimated by minimizing the negative

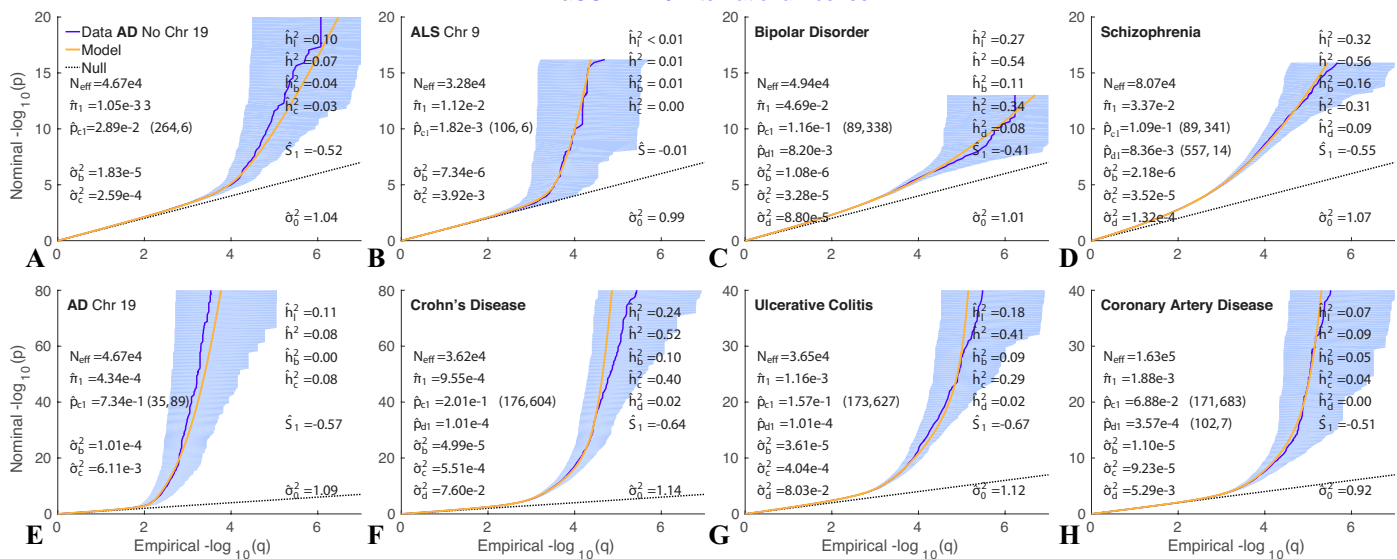

Figure 2: QQ plots of (pruned) z-scores for qualitative phenotypes (dark blue, 95% confidence interval in light blue) with model prediction (yellow). See Supplementary Material Figures S14 to S21. The value given for  $p_{c1}$  is the amplitude of the full  $p_c(L)$  function, which occurs at  $L = 1$ ; the values  $(m_c, w_c)$  in parentheses following it are the total LD ( $m_c$ ) where the function falls to half its amplitude (the middle gray dashed lines in Figure 1 are examples), and the total LD width ( $w_c$ ) of the transition region (distance between flanking red dashed lines in Figure 1). Similarly for  $p_{d1}$  ( $m_d, w_d$ ), where given.  $h_b^2$ ,  $h_c^2$ , and  $h_d^2$  are the heritabilities associated with the “b”, “c”, and “d” Gaussians, respectively.  $h^2$  is the total SNP heritability, reexpressed as  $h_l^2$  on the liability scale for binary phenotypes. Parameter values are also given in Table 1 and heritabilities are also in Table 3; numbers of causal SNPs are in Table 2. Reading the plots: on the vertical axis, choose a p-value threshold for typed or imputed SNPs (SNPs with z-scores; more extreme values are further from the origin), then the horizontal axis gives the proportion,  $q$ , of typed SNPs exceeding that threshold (higher proportions are closer to the origin). See also Supplementary Figure S1, where the y-axis is restricted to  $0 \leq -\log_{10}(p) \leq 10$ .

of the log likelihood of the data (z-scores) as a function of the parameters. This is done with the “b” model as before [16], and then proceeding iteratively with the more complex models, with extensive single and multiple parameter searches (to avoid being trapped in local minima) until all parameters simultaneously are at a convex minimum. This involved many explicit linear or grid searches as well as many Nelder-Mead multidimensional unconstrained non-linear minimizations.

The total SNP heritability is given by the sum of heritability contributions of each SNP in the reference panel from each of the relevant Gaussians. In the Bayesian approach, we do not know the value of the causal effect of any particular SNP, but we assume it comes from a distribution,  $\beta(H, L)$ , which characterize our ignorance of it, where  $H$  is the SNP’s heterozygosity and  $L$  is its total LD. For a specific Gaussian (“b”, “c”, or “d”) in our model, the contribution of the SNP to heritability is given by the prior probability that the SNP is causal with respect to that Gaussian, times the expected value of the square of the effect size,  $E(\beta^2)$ , times  $H$  [16]. For the “c” Gaussian, for example, the prior probability that the SNP is causal is  $\pi_1 p_c(L)$ , and  $E(\beta^2)$  is just the variance,  $H^S \sigma_c^2$ . Thus, the contribution of this SNP to the overall heritability associated with the “c” Gaussian,  $h_c^2$ , is  $\pi_1 p_c(L) H^S \sigma_c^2 H$ . Below we report the sums over all such contributions. The number of causal SNPs associated with the “c” Gaussian,  $n_c$ , is given by summing  $\pi_1 p_c(L)$  for each reference panel SNP,

and similarly for the other Gaussians. All heritabilities and discoverabilities are, as before, corrected with respect to the inflation parameter, i.e., divided by  $\sigma_0^2$ .

All code used in the analyses, including simulations, is publicly available on GitHub [15, 14].

## Data Preparation

We analyzed summary statistics for fourteen phenotypes-genotypes (in what follows, where sample sizes varied by SNP, we quote the median value): (1) bipolar disorder ( $N_{cases} = 20,352$ ,  $N_{controls} = 31,358$ ) [37]; (2) schizophrenia ( $N_{cases} = 35,476$ ,  $N_{controls} = 46,839$ ) [30]; (3) coronary artery disease ( $N_{cases} = 60,801$ ,  $N_{controls} = 123,504$ ) [25]; (4) ulcerative colitis ( $N_{cases} = 12,366$ ,  $N_{controls} = 34,915$ ) and (5) Crohn’s disease ( $N_{cases} = 12,194$ ,  $N_{controls} = 34,915$ ) [8]; (6) late onset Alzheimer’s disease (LOAD;  $N_{cases} = 17,008$ ,  $N_{controls} = 37,154$ ) [19] (in the Supplementary Material we present results for a more recent GWAS with  $N_{cases} = 71,880$  and  $N_{controls} = 383,378$  [18]); (7) amyotrophic lateral sclerosis (ALS) ( $N_{cases} = 12,577$ ,  $N_{controls} = 23,475$ ) [40]; (8) number of years of formal education ( $N = 293,723$ ) [26]; (9) intelligence ( $N = 262,529$ ) [33, 29]; (10) body mass index ( $N = 233,554$ ) [21]; (11) height (2010) ( $N = 133,735$ ) [44]; and height (2014) ( $N = 251,747$ ) [42]; (12) low- ( $N = 89,873$ ) and (13) high-density lipoprotein ( $N = 94,295$ ) [41]; and (14) total cholesterol ( $N = 94,579$ ) [41]. Most participants were of European ancestry. (A spreadsheet giving data sources is provided in the Supplement.)

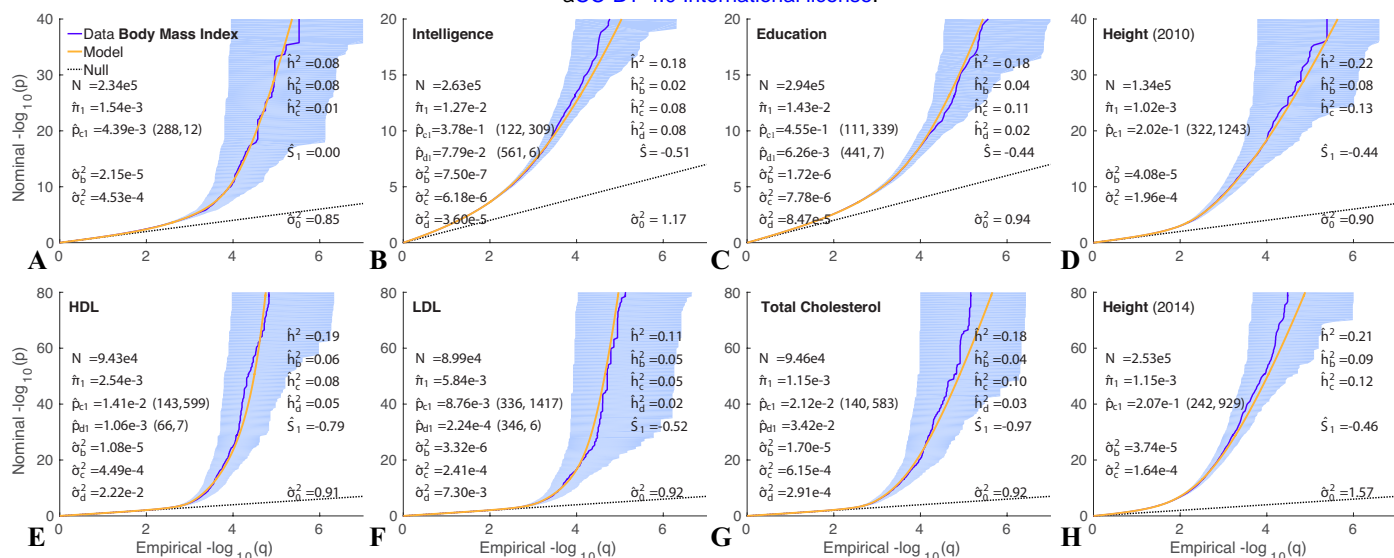

Figure 3: QQ plots of (pruned) z-scores for quantitative phenotypes (dark blue, 95% confidence interval in light blue) with model prediction (yellow). See Supplementary Material Figures S22 to S32. For HDL,  $p_c(L) = p_{c1}$  for all  $L$ ; for bipolar disorder and LDL,  $p_d(L) = p_{d1}$  for all  $L$ . See caption to Figure 2 for further description. See also Supplementary Figure S2, where the y-axis is restricted to  $0 \leq -\log_{10}(p) \leq 10$ .

| Phenotype   | $\pi_1$ | $\sigma_b^2$ | $\sigma_c^2$ | $S$   | $p_{c1}$ | $m_c$ | $w_c$ | $\sigma_d^2$ | $p_{d1}$ | $m_d$ | $w_d$ | $\sigma_0^2$ |
|-------------|---------|--------------|--------------|-------|----------|-------|-------|--------------|----------|-------|-------|--------------|
| SCZ 2014    | 3.37e-2 | 2.2e-6       | 3.5e-5       | -0.55 | 0.11     | 89    | 341   | 1.3e-4       | 8.4e-3   | 557   | 14    | 1.07         |
| BIP         | 4.69e-2 | 1.1e-6       | 3.3e-5       | -0.41 | 0.12     | 89    | 338   | 8.8e-5       | 8.2e-3   | —     | —     | 1.01         |
| CD          | 9.55e-4 | 5.0e-5       | 5.5e-4       | -0.64 | 0.20     | 176   | 604   | 7.6e-2       | 1.0e-4   | —     | —     | 1.14         |
| UC          | 1.16e-3 | 3.6e-5       | 4.0e-4       | -0.67 | 0.16     | 173   | 627   | 8.0e-2       | 1.0e-4   | —     | —     | 1.12         |
| CAD         | 1.88e-3 | 1.1e-5       | 9.2e-5       | -0.51 | 6.9e-2   | 171   | 683   | 5.3e-3       | 3.6e-4   | 102   | 7     | 0.92         |
| AD Chr19    | 4.34e-4 | 1.0e-4       | 6.1e-3       | -0.57 | 0.73     | 35    | 89    | —            | —        | —     | —     | 1.09         |
| AD NoC19    | 1.05e-3 | 1.8e-5       | 2.6e-4       | -0.52 | 2.9e-2   | 264   | 6     | —            | —        | —     | —     | 1.04         |
| ALS Chr9    | 1.12e-2 | 7.3e-6       | 3.9e-3       | -0.01 | 1.8e-3   | 106   | 6     | —            | —        | —     | —     | 0.99         |
| Edu         | 1.43e-2 | 1.7e-6       | 7.8e-6       | -0.44 | 0.45     | 111   | 339   | 8.5e-5       | 6.3e-3   | 441   | 7     | 0.94         |
| IQ 2018     | 1.27e-2 | 7.5e-7       | 6.2e-6       | -0.51 | 0.38     | 122   | 309   | 3.6e-5       | 7.8e-2   | 561   | 6     | 1.17         |
| Height 2010 | 1.02e-3 | 4.1e-5       | 2.0e-4       | -0.44 | 0.20     | 322   | 1243  | —            | —        | —     | —     | 0.90         |
| Height 2014 | 1.15e-3 | 3.7e-5       | 1.6e-4       | -0.46 | 0.21     | 242   | 929   | —            | —        | —     | —     | 1.57         |
| Height 2018 | 2.50e-3 | 8.7e-6       | 8.9e-5       | -0.43 | 0.37     | 210   | 739   | —            | —        | —     | —     | 2.12         |
| HDL         | 2.54e-3 | 1.1e-5       | 4.5e-4       | -0.79 | 1.4e-2   | 143   | 599   | 2.2e-2       | 1.1e-3   | 66    | 7     | 0.91         |
| LDL         | 5.84e-3 | 3.3e-6       | 2.4e-4       | -0.52 | 8.8e-3   | 336   | 1417  | 7.3e-3       | 2.2e-4   | 346   | 6     | 0.92         |
| BMI         | 1.54e-3 | 2.2e-5       | 4.5e-4       | 0.00  | 4.4e-3   | 288   | 12    | —            | —        | —     | —     | 0.85         |
| TC          | 1.15e-3 | 1.7e-5       | 6.2e-4       | -0.97 | 2.1e-2   | 140   | 583   | 2.9e-4       | 3.4e-2   | —     | —     | 0.92         |

Table 1: Model parameters for phenotypes, case-control (upper section) and quantitative (lower section).  $\pi_1$  is the overall proportion of the 11 million SNPs from the reference panel that are estimated to be causal.  $p_c(L \geq 1)$  is the prior probability multiplying the “c” Gaussian, which has variance  $H^S \sigma_c^2$ , where  $H$  is the reference SNP heterozygosity. Note that  $p_c(L)$  is just a sigmoidal curve, and can be characterized quite generally by three parameters: the value  $p_{c1} \equiv p_c(1)$  at  $L = 1$ ; the total LD value  $L = m_c$  at the mid point of the transition, i.e.,  $p_c(m_c) = p_{c1}/2$  (see the middle gray dashed lines in Figure 1, which shows examples of the function  $p_c(L)$ ); and the width  $w_c$  of the transition, defined as the distance (in  $L$ ) between where the curve falls to 95% and 5% of  $p_{c1}$  (distance between the flanking red dashed lines in Figure 1). Note that for AD Chr19, AD NoC19, and ALS Chr9,  $\pi_1$  is the fraction of reference SNPs on chromosome 19, on the autosome excluding chromosome 19, and on chromosome 9, respectively. For bipolar disorder, Crohn’s disease, ulcerative colitis, and total cholesterol  $p_d(L) = p_{d1}$  for all  $L$ . Examples of  $H^S$  multiplying  $\sigma_c^2$  are shown in Supplementary Material Figure S8. Estimated Bayesian information criterion (BIC) values for three models (B, C, and D) are shown in Supplementary material Table S4: the 3-parameter model B with only the “b” Gaussian ( $\pi_1, \sigma_b, \sigma_0$ ); the 8-parameter model C with both the “b” with “c” Gaussians (Eq. 4); and the 12-parameter model D with “b”, “c” and “d” Gaussians (Eq. 5). 95% confidence intervals are in Supporting Materials Tables S5-S7.

| Phenotype   | $n_b$ | $n_c$ | $n_d$ | $n_{causal}$ |
|-------------|-------|-------|-------|--------------|
| SCZ 2014    | 3.5e5 | 2.3e4 | 3.0e3 | 3.71e5       |
| BIP         | 4.8e5 | 3.4e4 | 4.2e3 | 5.16e5       |
| CD          | 9.0e3 | 1.5e3 | 1     | 1.05e4       |
| UC          | 1.1e4 | 1.4e3 | 2     | 1.27e4       |
| CAD         | 2.0e4 | 1.0e3 | 5     | 2.07e4       |
| AD Chr19    | 80    | 33    | —     | 113          |
| AD NoC19    | 1.1e4 | 294   | —     | 1.12e4       |
| ALS Chr9    | 5.3e3 | 7     | —     | 5.29e3       |
| Edu         | 1.1e5 | 4.4e4 | 956   | 1.58e5       |
| IQ 2018     | 9.6e4 | 3.4e4 | 1.1e4 | 1.40e5       |
| Height 2010 | 9.4e3 | 1.9e3 | —     | 1.13e4       |
| Height 2014 | 1.1e4 | 2.0e3 | —     | 1.26e4       |
| Height 2018 | 2.0e4 | 7.6e3 | —     | 2.75e4       |
| HDL         | 2.7e4 | 264   | 15    | 2.79e4       |
| LDL         | 6.4e4 | 463   | 14    | 6.43e4       |
| BMI         | 1.7e4 | 68    | —     | 1.69e4       |
| TC          | 1.2e4 | 180   | 434   | 1.27e4       |

| Phenotype   | $h_b^2$ | $h_c^2$ | $h_d^2$ | $h^2$ | $h_l^2$ |
|-------------|---------|---------|---------|-------|---------|
| SCZ 2014    | 0.16    | 0.31    | 0.09    | 0.56  | 0.32    |
| BIP         | 0.11    | 0.34    | 0.08    | 0.54  | 0.27    |
| CD          | 0.10    | 0.40    | 0.02    | 0.52  | 0.24    |
| UC          | 0.09    | 0.29    | 0.02    | 0.41  | 0.18    |
| CAD         | 0.05    | 0.04    | 0.00    | 0.09  | 0.07    |
| AD Chr19    | 0.00    | 0.08    | —       | 0.08  | 0.11    |
| AD NoC19    | 0.04    | 0.03    | —       | 0.07  | 0.10    |
| ALS Chr9    | 0.01    | 0.00    | —       | 0.01  | 0.00    |
| Edu         | 0.04    | 0.11    | 0.02    | 0.18  | —       |
| IQ 2018     | 0.02    | 0.08    | 0.08    | 0.18  | —       |
| Height 2010 | 0.08    | 0.13    | —       | 0.22  | —       |
| Height 2014 | 0.09    | 0.12    | —       | 0.21  | —       |
| Height 2018 | 0.04    | 0.24    | —       | 0.28  | —       |
| HDL         | 0.06    | 0.08    | 0.05    | 0.19  | —       |
| LDL         | 0.05    | 0.05    | 0.02    | 0.11  | —       |
| BMI         | 0.08    | 0.01    | —       | 0.08  | —       |
| TC          | 0.04    | 0.10    | 0.03    | 0.18  | —       |

Table 2: Numbers of causal SNPs.  $n_{causal}$  is the total number of causal SNPs (from the 11 million in the reference panel);  $n_b$ ,  $n_c$ , and  $n_d$  are the numbers associated with the "b", "c", and "d" Gaussians, respectively. 95% confidence intervals are in Supporting Materials Table S8.

In Figures 2 and S1 we report effective sample sizes,  $N_{eff}$ , for the case-control GWASs. This is defined as  $N_{eff} = 4/(1/N_{cases} + 1/N_{controls})$ , so that when  $N_{cases} = N_{controls}$ ,  $N_{eff} = N_{cases} + N_{controls} = N$ , the total sample size, allowing for a straightforward comparison with quantitative traits.

In estimating heritabilities on the liability scale for the qualitative phenotypes [16], we assumed prevalences of: BIP 0.5% [24], SCZ 1% [35], CAD 3% [28], UC 0.1% [4], CD 0.1% [4], AD 14% (for people aged 71 and older in the USA [27, 1]), and ALS  $5 \times 10^{-5}$  [23].

Confidence intervals for parameters were estimated using the inverse of the observed Fisher information matrix (FIM). The full FIM was estimated for up to eight parameters used in Model C, and for the remaining parameters that extend the analysis to Model D the confidence intervals were approximated ignoring off-diagonal elements. Additionally, the  $w_d$  parameter was treated as fixed quantity, the lowest value allowing for a smooth transition of the  $p_d(L)$  function to 0 (see Supporting Material Figure S7; for BIP, CD, UC, and TC, however, the function  $p_d(L)$  was a constant ( $=p_d(1)$ ). For the derived quantities  $h^2$  and  $n_{causal}$ , which depend on multiple parameters, the covariances among the parameters, given by the off-diagonal elements of the inverse of the FIM, were incorporated. Numerical values are in Supporting Material Tables S5-S9.

In order to carry out realistic simulations (i.e., with realistic heterozygosity and LD structures for SNPs), we used HAPGEN2 [20, 36, 38] to generate genotypes for  $10^5$  samples; we calculated SNP MAF and LD structure from

Table 3: Heritabilities:  $h^2$  is the total additive SNP heritability, re-expressed on the liability scale as  $h_l^2$  for the qualitative traits (upper section).  $h_b^2$ ,  $h_c^2$ , and  $h_d^2$  are the heritabilities associated with the "b", "c", and "d" Gaussians, respectively. 95% confidence intervals are in Supporting Materials Table S9. A comparison of the total heritabilities with estimates from our basic model alone [16], and with estimates from other models [46, 45, 31] are given in Supplementary Table S1.

1000 simulated samples.

## RESULTS

### Phenotypes

Summary QQ plots for pruned z-scores are shown in Figure 2 for seven binary phenotypes (for AD we separate out chromosome 19, which contains the APOE gene), and in Figure 3 for seven quantitative phenotypes (including two separate GWAS for height), with model parameter values in Table 1; breakdowns of these summary plots with respect to a  $4 \times 4$  grid of heterozygosity  $\times$  total LD (each grid a subset of a  $10 \times 10$  grid) are in Supplementary Material Figures S14-S32. For each phenotype, model selection (B, C, or D) was performed by testing the Bayesian information criterion (BIC) – see SI Table 1.

The distributions of z-scores for different phenotypes are quite varied. Nevertheless, for most phenotypes analyzed here, we find evidence for larger and smaller effects being distributed differently, with strong dependence on total LD,  $L$ , and heterozygosity,  $H$ .

Our model estimates polygenicity as a one-dimensional function of  $L$ . We find that polygenicity is dominated by SNPs with low  $L$ . However, the degree of restriction varies widely across phenotypes, depending on the shapes and sizes of  $p_c(L)$  and  $p_d(L)$  in Eq. 5, the prior probabilities that a causal SNP belongs to the "c" and "d" Gaussians. These prior probabilities are shown in Figure 1 and SI

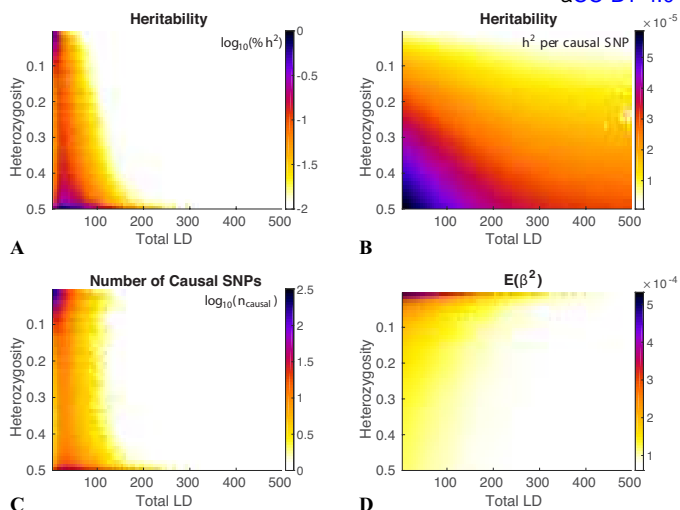

Figure 4: Model results for height (2014) using the BC model. The reference panel SNPs are binned with respect to both heterozygosity ( $H$ ) and total LD ( $L$ ) in a  $50 \times 50$  grid for  $0.02 \leq H \leq 0.5$  and  $1 \leq L \leq 500$ . Shown are model estimates of: (A)  $\log_{10}$  of the percentage of heritability in each grid element; (B) for each element, the average heritability per causal SNP in the element; (C)  $\log_{10}$  of the number of causal SNPs in each element; and (D) the expected  $\beta^2$  for the element-wise causal SNPs. Note that  $H$  increases from top to bottom.

Figures S5-S7. Taking into account the underlying distribution of reference SNPs with respect to heterozygosity, these distributions lead to a varied pattern across phenotypes of the expected number of causal SNPs in equally-spaced elements in a two-dimensional  $H \times L$  grid, as shown for height (2014) in Figure 4 C, and for all phenotypes in SI Figures S10-S13 (third columns). Further, for any given phenotype, the effect sizes of causal variants come from distributions whose variances can be widely different – by up to two orders of magnitude. Thus, given the prior probabilities ( $p_b$ ,  $p_c$ , and  $p_d$ ) by which these distributions are modulated as a function of  $L$ , we are able to estimate the expected effect size per causal SNP,  $E(\beta^2)$ , in each  $H \times L$  grid element, as shown in Figure 4 D and SI Figures S10-S13 (fourth columns). In general, depending on the shapes and sizes of  $p_c(L)$  and  $p_d(L)$ , SNPs with lower  $L$  have larger  $E(\beta^2)$ . However, the selection parameter  $S$  in the “c” Gaussian has a large impact on  $E(\beta^2)$  as a function of  $H$  (see SI Figure S8). As a result, for most phenotypes, we find that the effect sizes for low MAF causal SNPs ( $H < 0.05$ ) are several times larger than for more common causal SNPs ( $H > 0.1$ ). We find that heritability per causal SNP is larger for lower  $L$ , a general pattern that follows from at least one of the prior probabilities,  $p_c(L)$  or  $p_d(L)$ , being non-constant. However, because heritability per causal SNP is proportional to  $H$ , we find that, even with negative selection parameter,  $S$  (and thus larger  $E(\beta^2)$  for lower  $H$ ), the heritability per causal SNP is largest for the most common causal SNPs ( $H > 0.45$ ).

## Simulations

To test the specificity of the model for each real phenotype, we constructed simulations where, in each case, the true causal  $\beta$ 's (a single vector instantiation) for all reference panel SNPs were drawn from the overall distribution defined by the real phenotype's parameters (thus being the “true” simulation parameters). We set up simulated phenotypes for 100,000 samples by adding noise to the genetic component of the simulated phenotype [16], and performed a GWAS to calculate z-scores. We then sought to determine whether the true parameters, and the component heritabilities, could reasonably be estimated by our model. In SI Figures S3 and S4 we show the results for the simulated case-control and quantitative phenotypes, respectively. Overall heritabilities were generally faithful to the true values (the values estimated for the real phenotypes) – see Supplementary Table S3 – though for Crohn's disease the simulated value was overestimated due to the  $h_d$  component. Note that for the case-control simulated phenotypes, the heritabilities on the observed scale, denoted  $\hat{h}^2$  in SI Figure S3, should be compared with the corresponding values in Figure 2, not with  $\hat{h}_l^2$ , which denotes heritability on the liability scale, i.e., adjusted for population prevalence. Polygenicities and discoverabilities were also generally faithfully reproduced. However, for ALS restricted to chromosome 9, and BMI, the selection parameter was incorrectly estimated, owing to the weak signal in these GWAS and very low polygenicity (small number of causal SNPs) for the “c” Gaussian. Given the wide variety and even extreme ranges in parameters and heritability components across diverse simulated phenotypes, the multiple simulated examples provide checks respect to each-other for correctly discriminating phenotypes by means of their model parameter estimates: the results for individual cases are remarkably faithful to the respective true values, demonstrating the utility of the model in distinguishing different phenotypes.

## DISCUSSION

We propose an extended Gaussian mixture model for the distribution of underlying SNP-level causal genetic effects in human complex phenotypes, allowing for the phenotype-specific distribution to be modulated by heterozygosity,  $H$ , and total LD,  $L$ , of the causal SNPs, and also allowing for independent distributions for large and small effects. The GWAS z-scores for the typed or imputed SNPs, in addition to having a random environmental and error contribution, arise through LD with the causal SNPs. Thus, taking the detailed LD and heterozygosity structure of the population into account by using a reference panel, we are able to model the distribution of z-scores and test the applicability of our model to human complex phenotypes.

Complex phenotypes are emergent phenomena arising from random mutations and selection pressure. With many underlying causal variants, coming from a multitude of

functional categories [32], it is likely that different variants will experience different evolutionary pressure – negative, neutral, or positive – due at least to pleiotropic roles.

Here, we find evidence for markedly different genetic architectures across diverse complex phenotypes, where the polygenicity (or, equivalently, the prior probability that a SNP is causal) is a function of SNP total LD ( $L$ ), and discoverability is multi-component and MAF dependent.

In contrast to previous work modeling the distribution of causal effects that took total LD and multiple functional annotation categories into account while implicitly assuming a polygenicity of 1 [10], or took MAF into account while ignoring total LD dependence and different distributions for large and small effects [45], or took independent distributions for large and small effects into account (which is related to incorporating multiple functional annotation categories) while ignoring total LD and MAF dependence, here we combine all these issues in a unified way, using an extensive underlying reference panel of  $\sim 11$  million SNPs and an exact methodology using Fourier transforms to relate summary GWAS statistics to the posited underlying distribution of causal effects [16]. We show that the distributions of all sets of phenotypic z-scores, including extreme values that are well within genome-wide significance, are accurately reproduced by the model, both at overall summary level and when broken down with respect to a  $10 \times 10$   $H \times L$  grid – even though the various phenotypic polygenicities and per-causal-SNP heritabilities range over orders of magnitude.

Selection pressure can be assessed by measuring the extent of long-range LD, given heterozygosity and local recombination rates. In general, the signature of positive selection is higher heterozygosity of variants given the extent of LD (or higher extended LD, given the heterozygosity). Negative selection acts to keep variants (mutations) deleterious to fitness at low frequency (or ultimately remove them), a process that is facilitated by higher recombination rates [13]. There are more ways of being wrong than being right: any given mutation is more likely to be deleterious to, rather than aid, fitness. Since weakly deleterious variants will take a while to be removed, recent variants are likely to be deleterious [22]. In addition, the larger the effect of a deleterious variant the more efficient negative selection will be, which all suggests that the lower the MAF the larger the effect size. On the other hand, older variants, being old, are likely to have been positively selected (perhaps pleiotropically with a fitness-related trait), and over time will acquire LD with recent variants [10]. So when negative selection is operating, we should expect to find more and more effects with larger and larger effect size at lower total LD and lower heterozygosity.

It was found in [10] – which, in addition to analyzing total LD, modeled allele age and recombination rates – that common variants associated with complex traits are weakly deleterious to fitness, in line with the earlier model result that most of the variance in fitness comes from rare

variants that have a large effect on the trait in question [9]. Thus, larger per-allele effect sizes for less common variants is consistent with the action of negative selection. Further, based on a model equivalent to Eq. 2 with  $p_c \equiv 1$ , it was argued in [45], using forward simulations and a commonly used demographic model [11], that negative values for the selection parameter,  $S$ , which leads to larger effects for rarer variants, is a signature of negative selection. Similar results were found for the related infinitesimal model ( $p_c \equiv 1$  and  $\pi_1 \equiv 1$ ) in [31].

We find negative selection parameter values for most traits, which is broadly in agreement with [45] with the exception of BMI, which we find can be modeled with two Gaussians with no heterozygosity dependence, though it should be noted that the polygenicity for the larger-effects Gaussian (the “c” Gaussian with the  $S$  parameter) is very low, amounting to an estimate of only 68 common causal SNPs of large effect. A similar situation ( $S \simeq 0$ ) obtains with ALS restricted to chromosome 9; here, the sample size is relatively low, leading to a weak signal, and we estimate only 7 common causal SNPs associated with the “c” Gaussian. Our BMI results are not in agreement with the results of others. For the UKB data, Zeng et al [45] report a selection parameter  $S = -0.283$  [-0.377, -0.224],  $h^2 = 0.276$ , and  $n_{causal} = 45k$ , while Schoech et al [31] report a selection parameter  $\alpha = -0.24$  [-0.38, -0.06], and  $h^2 = 0.31$ . For the same dataset as used here, Zhang et al [46] report  $h^2 = 0.20$  and  $n_{causal} = 18k$ . It is not clear why our BMI results are in such disagreement with these. For height, our selection parameter  $S = -0.46$  (2014 GWAS) is in reasonable agreement with  $S = -0.422$  reported in [45], and with  $\alpha = -0.45$  reported in [31].

Compared with our basic model results [16], we generally have found that using the extended model presented here heritabilities show a marked increase – see Supplementary Table S1. However, due to the small effect sizes associated with the “b” Gaussian as a component of the extended model, the overall number of causal SNPs can be considerably larger. Supplementary Figures S10-S13 capture the breakdown in SNP contributions to heritability as a function of heterozygosity and total linkage disequilibrium.

Generally, we find evidence for the existence of genetic architectures where the per causal-SNP heritability is larger for more common SNPs and/or for SNPs with lower total LD. But the trend is not uniform across phenotypes – see SI Figures S10-S13, second columns. The observed-scale heritability estimates given by  $h_b^2$  correspond to our earlier estimates [16]. The new final values presented here result from a model that gives better fits between data and model prediction of the summary and detailed QQ plots, and thus constitute more accurate estimates of SNP heritability. For 2010 and 2014 height GWASs, we obtain very good consistency for the model parameters and therefore heritability, despite considerable difference in apparent inflation. The 2018 height GWAS has a much larger sample size (almost three quarters of



a million); the slightly different parameter estimates for it might arise due to population structure not fully captured by our model [34, 2]. Our  $h^2$  estimates for height, however, remain consistently lower than other reported results (e.g.,  $h^2 = 0.33$  in [46],  $h^2 = 0.527$  in [45],  $h^2 = 0.61$  in [31]). For educational attainment, our heritability estimate agrees with [45] ( $h^2 = 0.182$ ), despite our using a sample more than twice as large. The difference in selection parameter value,  $S = -0.335$  in [45] versus  $S = -0.44$  here, might be explained by the model differences (Zeng et al use one causal Gaussian with MAF-dependence but no LD dependence). A comparison of the total heritabilities reported here with estimates from the work of others [46, 45, 31], in addition our basic model alone [16], are given in Supplementary Table S1.

For most traits, we find strong evidence that causal SNPs with low heterozygosity have larger effect sizes ( $S < 0$  in Table 1; the effect of this as an amplifier of  $\sigma_c^2$  in Eq. 5 is illustrated in Supplementary Material Figure S8) – see SI Figures S10-S13, fourth columns. Thus, negative selection seems to play an important role in most phenotypes-genotypes. This is also indicated by the extent of the region of finite probability for variants of large effect sizes (which are enhanced by having  $S \lesssim -0.4$ ) being relatively rare (low  $H$ ), which will be greater for larger  $p_{c1}$ , the amplitude of the prior probability for “c” Gaussian (see SI Figures S5 and S6).

The “b” Gaussian in Eq. 4 or 5 does not involve a selection parameter: effect size variance is independent of MAF. Thus, causal SNPs associated with this Gaussian are likely undergoing neutral (or very weakly negative) selection. It should be noted that in all traits examined here, whether or not there is evidence of negative selection ( $S < 0$ ), the effect size variance of the “b” Gaussian is many times smaller – sometimes by more than an order of magnitude – than that for the “c” Gaussian. Thus, it appears there are many causal variants of weak effect undergoing neutral (or very weakly negative) selection. For the ten phenotypes where the “d” Gaussian could be implemented, its variance parameter was several times larger than that of the “c” Gaussian. However, the amplitude of the prior probability for the “d” Gaussian,  $p_{d1}$ , was generally much smaller than the amplitudes of the prior probabilities for the “b” or “c” Gaussians, which translated into a relatively small number of causal variants with very large effect associated with this Gaussian. (Due to lack of power, in four instances – BIP, CD, UC, and TC –  $p_d(L)$  was treated as a constant, i.e., independent of  $L$ .) Interestingly, intelligence had the highest number of causal SNPs associated with this Gaussian, while the extent of total LD for associated SNPs was also liberal ( $m_d = 561$ ; see also SI Figure S7). It is possible that some of these SNPs are undergoing positive selection, but we did not find direct evidence of that.

We find a diversity of genetic architectures across multiple human complex phenotypes. We find that SNP total LD plays an important role in the likelihood of the SNP

being causal, and in the effect size of the SNP. In general, we find that lower total LD SNPs are more likely to be causal with larger effects. Furthermore, for most phenotypes, while taking total LD into account, we find that causal SNPs with lower MAF have larger effect sizes, a phenomenon indicative of negative selection. Additionally, for all phenotypes, we found evidence of neutral selection operating on SNPs with relatively weak effect. We did not find direct evidence of positive selection. Future work will explore SNP functional annotation categories and their differential roles in human complex phenotypes.

## Funding

Research Council of Norway (262656, 248984, 248778, 223273) and KG Jebsen Stiftelsen; ABCD-USA Consortium (5U24DA041123).

## References

- [1] Alzheimer’s Association, 2018. 2018 alzheimer’s disease facts and figures. *Alzheimer’s & Dementia* 14 (3), 367–429.
- [2] Berg, J. J., Harpak, A., Sinnott-Armstrong, N., Joergensen, A. M., Mostafavi, H., Field, Y., Boyle, E. A., Zhang, X., Racimo, F., Pritchard, J. K., et al., 2019. Reduced signal for polygenic adaptation of height in uk biobank. *eLife* 8, e39725.
- [3] Bulik-Sullivan, B. K., Loh, P.-R., Finucane, H. K., Ripke, S., Yang, J., Patterson, N., Daly, M. J., Price, A. L., Neale, B. M., of the Psychiatric Genomics Consortium, S. W. G., et al., 2015. Ld score regression distinguishes confounding from polygenicity in genome-wide association studies. *Nature genetics* 47 (3), 291–295.
- [4] Burisch, J., Jess, T., Martinato, M., Lakatos, P. L., ECCO-EpiCom, 2013. The burden of inflammatory bowel disease in europe. *Journal of Crohn’s and Colitis* 7 (4), 322–337.
- [5] Consortium, . G. P., et al., 2012. An integrated map of genetic variation from 1,092 human genomes. *Nature* 491 (7422), 56–65.
- [6] Consortium, . G. P., et al., 2015. A global reference for human genetic variation. *Nature* 526 (7571), 68–74.
- [7] Consortium, I. H. ., et al., 2010. Integrating common and rare genetic variation in diverse human populations. *Nature* 467 (7311), 52.
- [8] de Lange, K. M., Moutsianas, L., Lee, J. C., Lamb, C. A., Luo, Y., Kennedy, N. A., Jostins, L., Rice, D. L., Gutierrez-Achury, J., Ji, S.-G., et al., 2017. Genome-wide association study implicates immune activation of multiple integrin genes in inflammatory bowel disease. *Nature genetics* 49 (2), 256.
- [9] Eyre-Walker, A., 2010. Genetic architecture of a complex trait and its implications for fitness and genome-wide association studies. *Proceedings of the National Academy of Sciences* 107 (suppl 1), 1752–1756.
- [10] Gazal, S., Finucane, H. K., Furlotte, N. A., Loh, P.-R., Palamara, P. F., Liu, X., Schoech, A., Bulik-Sullivan, B., Neale, B. M., Gusev, A., et al., 2017. Linkage disequilibrium-dependent architecture of human complex traits shows action of negative selection. *Nature genetics* 49 (10), 1421.
- [11] Gravel, S., Henn, B. M., Gutenkunst, R. N., Indap, A. R., Marth, G. T., Clark, A. G., Yu, F., Gibbs, R. A., Bustamante, C. D., Project, . G., et al., 2011. Demographic history and rare allele sharing among human populations. *Proceedings of the National Academy of Sciences* 108 (29), 11983–11988.
- [12] Hibar, D. P., Stein, J. L., Renteria, M. E., Arias-Vasquez, A., Desrivieres, S., Jahanshad, N., Toro, R., Wittfeld, K., Abramovic, L., Andersson, M., et al., 2015. Common genetic variants influence human subcortical brain structures. *Nature*.

- [13] Hill, W., Robertson, A., 2007. The effect of linkage on limits to artificial selection. *Genetics Research* 89 (5-6), 311–336.
- [14] Holland, D., 2019. GWAS-Causal-Effects-Extended-Model. <https://github.com/dominicholland/GWAS-causalEffects-extendedModel>.
- [15] Holland, D., 2019. GWAS-Causal-Effects-Model. <https://github.com/dominicholland/GWAS-Causal-Effects-Model>.
- [16] Holland, D., Desikan, R., Frei, O., Fan, C., Shadrin, A., Smeland, O., Sundar, V., Thompson, P., Andreassen, O., Dale, A., 2019. Beyond snp heritability: Polygenicity and discoverability of phenotypes estimated with a univariate gaussian mixture model. *Forthcoming in PLOS Genetics*.  
URL <https://doi.org/10.1101/133132>
- [17] Holland, D., Fan, C.-C., Frei, O., Shadrin, A. A., Smeland, O. B., Sundar, V. S., Andreassen, O. A., Dale, A. M., 2017. Estimating degree of polygenicity, causal effect size variance, and confounding bias in gwas summary statistics. *bioRxiv*.  
URL <https://www.biorxiv.org/content/early/2017/05/24/133132>
- [18] Jansen, I., Savage, J., Watanabe, K., Bryois, J., Williams, D., Steinberg, S., Sealock, J., Karlsson, I., Hagg, S., Athanasias, L., et al., 2018. Genetic meta-analysis identifies 10 novel loci and functional pathways for alzheimer’s disease risk. *bioRxiv*, 258533.
- [19] Lambert, J.-C., Ibrahim-Verbaas, C. A., Harold, D., Naj, A. C., Sims, R., Bellenguez, C., Jun, G., DeStefano, A. L., Bis, J. C., Beecham, G. W., et al., 2013. Meta-analysis of 74,046 individuals identifies 11 new susceptibility loci for alzheimer’s disease. *Nature genetics* 45 (12), 1452–1458.
- [20] Li, N., Stephens, M., 2003. Modeling linkage disequilibrium and identifying recombination hotspots using single-nucleotide polymorphism data. *Genetics* 165 (4), 2213–2233.
- [21] Locke, A. E., Kahali, B., Berndt, S. I., Justice, A. E., Pers, T. H., Day, F. R., Powell, C., Vedantam, S., Buchkovich, M. L., Yang, J., et al., 2015. Genetic studies of body mass index yield new insights for obesity biology. *Nature* 518 (7538), 197.
- [22] Maruyama, T., 1974. The age of a rare mutant gene in a large population. *American journal of human genetics* 26 (6), 669.
- [23] Mehta, P., Kaye, W., Raymond, J. e. a., 2018. Prevalence of amyotrophic lateral sclerosis 2014 united states. *MMWR Morb Mortal Wkly Rep* 67, 216–218.
- [24] Merikangas, K. R., Jin, R., He, J.-P., Kessler, R. C., Lee, S., Sampson, N. A., Viana, M. C., Andrade, L. H., Hu, C., Karam, E. G., et al., 2011. Prevalence and correlates of bipolar spectrum disorder in the world mental health survey initiative. *Archives of general psychiatry* 68 (3), 241–251.
- [25] Nikpay, M., Goel, A., Won, H.-H., Hall, L. M., Willenborg, C., Kanoni, S., Saleheen, D., Kyriakou, T., Nelson, C. P., Hopewell, J. C., et al., 2015. A comprehensive 1000 genomes-based genome-wide association meta-analysis of coronary artery disease. *Nature genetics* 47 (10), 1121.
- [26] Okbay, A., Beauchamp, J. P., Fontana, M. A., Lee, J. J., Pers, T. H., Rietveld, C. A., Turley, P., Chen, G.-B., Emilsson, V., Meddens, S. F. W., et al., 2016. Genome-wide association study identifies 74 loci associated with educational attainment. *Nature* 533 (7604), 539–542.
- [27] Plassman, B. L., Langa, K. M., Fisher, G. G., Heeringa, S. G., Weir, D. R., Ofstedal, M. B., Burke, J. R., Hurd, M. D., Potter, G. G., Rodgers, W. L., et al., 2007. Prevalence of dementia in the united states: the aging, demographics, and memory study. *Neuroepidemiology* 29 (1-2), 125–132.
- [28] Sanchis-Gomar, F., Perez-Quilis, C., Leischik, R., Lucia, A., 2016. Epidemiology of coronary heart disease and acute coronary syndrome. *Annals of translational medicine* 4 (13).
- [29] Savage, J., Jansen, P., Stringer, S., Watanabe, K., Bryois, J., de Leeuw, C., Nagel, M., Awasthi, S., Barr, P., Coleman, J., Grasby, K., Hammerschlag, A., Kaminski, J., Karlsson, R., et al., 2018. Genome-wide association meta-analysis (n=269,867) identifies new genetic and functional links to intelligence. *Nature genetics forthcoming*.  
URL [https://ctg.cncr.nl/software/summary\\_statistics](https://ctg.cncr.nl/software/summary_statistics)
- [30] Schizophrenia Working Group of the Psychiatric Genomics Consortium, Jul 2014. Biological insights from 108 schizophrenia-associated genetic loci. *Nature* 511 (7510), 421–427.
- [31] Schoech, A. P., Jordan, D. M., Loh, P.-R., Gazal, S., O’2019Connor, L. J., Balick, D. J., Palamara, P. F., Finucane, H. K., Sunyaev, S. R., Price, A. L., 2019. Quantification of frequency-dependent genetic architectures in 25 uk biobank traits reveals action of negative selection. *Nature communications* 10 (1), 790.
- [32] Schork, A. J., Thompson, W. K., Pham, P., Torkamani, A., Roddey, J. C., Sullivan, P. F., Kelsoe, J. R., O’Donovan, M. C., Furberg, H., Schork, N. J., et al., 2013. All snps are not created equal: genome-wide association studies reveal a consistent pattern of enrichment among functionally annotated snps. *PLoS genetics* 9 (4), e1003449.
- [33] Sniekers, S., Stringer, S., Watanabe, K., Jansen, P. R., Coleman, J. R., Krapohl, E., Taskesen, E., Hammerschlag, A. R., Okbay, A., Zabaneh, D., et al., 2017. Genome-wide association meta-analysis of 78,308 individuals identifies new loci and genes influencing human intelligence. *Nature genetics* 49 (7), 1107.
- [34] Sohail, M., Maier, R. M., Ganna, A., Bloemendal, A., Martin, A. R., Turchin, M. C., Chiang, C. W., Hirschhorn, J., Daly, M. J., Patterson, N., et al., 2019. Polygenic adaptation on height is overestimated due to uncorrected stratification in genome-wide association studies. *eLife* 8, e39702.
- [35] Speed, D., Cai, N., Johnson, M. R., Nejentsev, S., Balding, D. J., Consortium, U., et al., 2017. Reevaluation of snp heritability in complex human traits. *Nature genetics* 49 (7), 986.
- [36] Spencer, C. C., Su, Z., Donnelly, P., Marchini, J., 2009. Designing genome-wide association studies: sample size, power, imputation, and the choice of genotyping chip. *PLoS Genet* 5 (5), e1000477.
- [37] Stahl, E. A., Breen, G., Forstner, A. J., McQuillin, A., Ripke, S., Trubetskoy, V., Mattheisen, M., Wang, Y., Coleman, J. R., Gaspar, H. A., et al., 2019. Genome-wide association study identifies 30 loci associated with bipolar disorder. *Nature genetics*, 1.
- [38] Su, Z., Marchini, J., Donnelly, P., 2011. Hapgen2: simulation of multiple disease snps. *Bioinformatics* 27 (16), 2304–2305.
- [39] Sveinbjornsson, G., Albrechtsen, A., Zink, F., Gudjonsson, S. A., Oddson, A., Måsson, G., Holm, H., Kong, A., Thorsteinsdottir, U., Sulem, P., et al., 2016. Weighting sequence variants based on their annotation increases power of whole-genome association studies. *Nature genetics*.
- [40] Van Rheenen, W., Shatunov, A., Dekker, A. M., McLaughlin, R. L., Diekstra, F. P., Pulit, S. L., Van Der Spek, R. A., Vösa, U., De Jong, S., Robinson, M. R., et al., 2016. Genome-wide association analyses identify new risk variants and the genetic architecture of amyotrophic lateral sclerosis. *Nature genetics* 48 (9), 1043.
- [41] Willer, C. J., Schmidt, E. M., Sengupta, S., Peloso, G. M., Gustafsson, S., Kanoni, S., Ganna, A., Chen, J., Buchkovich, M. L., Mora, S., et al., 2013. Discovery and refinement of loci associated with lipid levels. *Nature genetics* 45 (11), 1274.
- [42] Wood, A. R., Esko, T., Yang, J., Vedantam, S., Pers, T. H., Gustafsson, S., Chu, A. Y., Estrada, K., Luan, J., Kutalik, Z., et al., 2014. Defining the role of common variation in the genomic and biological architecture of adult human height. *Nature genetics* 46 (11), 1173–1186.
- [43] Wray, N. R., Ripke, S., Mattheisen, M., Trzaskowski, M., Byrne, E. M., Abdellaoui, A., Adams, M. J., Agerbo, E., Air, T. M., Andlauer, T. M., et al., 2018. Genome-wide association analyses identify 44 risk variants and refine the genetic architecture of major depression. *Nature genetics* 50 (5), 668.
- [44] Yang, J., Benyamin, B., McEvoy, B. P., Gordon, S., Henders, A. K., Nyholt, D. R., Madden, P. A., Heath, A. C., Martin, N. G., Montgomery, G. W., Goddard, M. E., Visscher, P. M., Jul 2010. Common SNPs explain a large proportion of the heritability for human height. *Nat. Genet.* 42 (7), 565–569.
- [45] Zeng, J., Vlaming, R., Wu, Y., Robinson, M. R., Lloyd-Jones, L. R., Yengo, L., Yap, C. X., Xue, A., Sidorenko, J., McRae,

A. F., et al., 2018. Signatures of negative selection in the genetic architecture of human complex traits. *Nature genetics* 50 (5), 746.

- [46] Zhang, Y., Qi, G., Park, J.-H., Chatterjee, N., 2018. Estimation of complex effect-size distributions using summary-level statistics from genome-wide association studies across 32 complex traits. *Nature genetics* 50 (9), 1318.
